# Supplementary material for: Inhibition of RNA-Binding Protein Musashi-1 Suppresses Malignant Properties and Reverses Paclitaxel Resistance in Ovarian Carcinoma
Source: PubMed Central journal article supplement — J Cancer. 2019 Feb 26;10(6):1580–92. doi: 10.7150/jca.27352 (PMC6485236; doi:10.7150/jca.27352), 2019-02-26
Supplement: jcav10p1580s1.pdf [file jcav10p1580s1.pdf]

Supplementary table

**Table S1. The target sequences of synthetic MSI-1 siRNA**

| Name            | Abb | Accession   | Target position | RNA oligo sequences<br>21nt guide (5'→3') | RNA oligo sequences<br>21nt passenger (5'→3') |
|-----------------|-----|-------------|-----------------|-------------------------------------------|-----------------------------------------------|
| MSI-1<br>siRNA1 | S1  | NM_002442.3 | 407-429         | ACAAAGAUCUUCUUCGUUCGA                     | GAACGAAGAAGAUCUUUGUGG                         |
| MSI-1<br>siRNA2 | S2  | NM_002442.3 | 576-598         | AAUUUCACACACUUUCUCCAC                     | GGAGAAAGUGUGUGAAAUUCA                         |
| MSI-1<br>siRNA3 | S3  | NM_002442.3 | 1518-1540       | AAAUCCAAAAGCCUUUUGGGG                     | CCAAAAGGCUUUUGGAUUUGU                         |
